# Supplementary material for: Insight into the Promoting Role of Er Modification on SO2 Resistance for NH3-SCR at Low Temperature over FeMn/TiO2 Catalysts
Source: MDPI journal article supplement (doi:10.3390/catal11050618), 2021-05-11
Supplement: s1 [file s1]

Supporting Information

# Insight into the promoting role of Er modification on SO<sub>2</sub> resistance for NH<sub>3</sub>-SCR at low temperature over FeMn/TiO<sub>2</sub> catalysts

Huan Du<sup>1</sup>, Zhitao Han<sup>1,2\*</sup>, Xitian Wu<sup>1</sup>, Chenglong Li<sup>1</sup>, Yu Gao<sup>1</sup>, Shaolong Yang<sup>3</sup>, Liguang Song<sup>1,2</sup>, Jingming Dong<sup>1,2</sup>, and Xinxiang Pan<sup>1,2,4\*</sup>

<sup>1</sup> Marine Engineering College, Dalian Maritime University, Dalian 116026, China;

<sup>2</sup> Liaoning Research Center for Marine Internal Combustion Engine Energy-Saving, Dalian 116026, China;

<sup>3</sup> School of Naval Architecture and Ocean Engineering, Huazhong University of Science and Technology, Wuhan 430074, China;

<sup>4</sup> Guangdong Ocean University, Zhanjiang, Guangdong, 524088, China.

\* Correspondence: hanzt@dlmu.edu.cn and panxx@dlmu.edu.cn; Tel.: +86-411-84723321

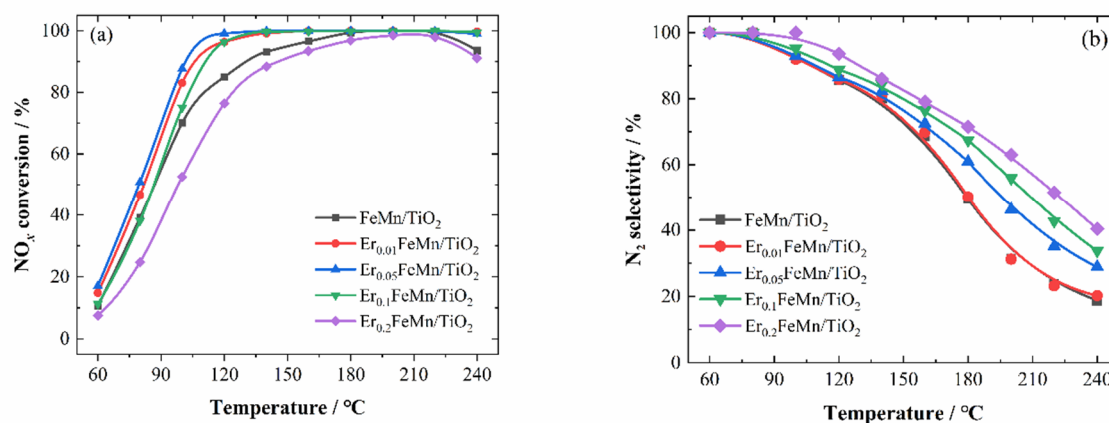

Figure S1. (a) NO<sub>x</sub> conversion, (b) N<sub>2</sub> selectivity in the NH<sub>3</sub>-SCR reaction (Reaction conditions: 1 mL catalyst, [NO] = [NH<sub>3</sub>] = 500 ppm, [O<sub>2</sub>] = 5 vol.%, [H<sub>2</sub>O] = 5 vol.% (when used), [SO<sub>2</sub>] = 100 ppm (when used), balanced with N<sub>2</sub>, GSHV = 30,000 h<sup>-1</sup>).

Table S1. Textural properties of FeMn/TiO<sub>2</sub> and Er<sub>0.05</sub>FeMn/TiO<sub>2</sub> catalysts.

| Sample                                      | $A_{\text{BET}}$ (m <sup>2</sup> /g) | $V_{\text{P}}$ (cm <sup>3</sup> /g) | $D_{\text{A}}$ /nm |
|---------------------------------------------|--------------------------------------|-------------------------------------|--------------------|
| FeMn/TiO <sub>2</sub>                       | 58.6                                 | 0.38                                | 22.0               |
| FeMnTiO <sub>2</sub> -S                     | 52.2                                 | 0.36                                | 24.7               |
| Er <sub>0.05</sub> FeMn/TiO <sub>2</sub>    | 59.5                                 | 0.38                                | 21.2               |
| Er <sub>0.05</sub> FeMn/TiO <sub>2</sub> -S | 57.4                                 | 0.43                                | 25.5               |

Table S2. H<sub>2</sub>-TPR results of FeMn/TiO<sub>2</sub> and Er<sub>0.05</sub>FeMn/TiO<sub>2</sub> catalysts.

| Sample                                      | Peak temperature (°C) / H <sub>2</sub> consumption(cm <sup>3</sup> /g STP) |           |          | Total H <sub>2</sub> consumption<br>(cm <sup>3</sup> /g STP) |
|---------------------------------------------|----------------------------------------------------------------------------|-----------|----------|--------------------------------------------------------------|
|                                             | Peak-1                                                                     | Peak-2    | Peak-3   |                                                              |
| FeMn/TiO <sub>2</sub>                       | 316/14.2                                                                   | 390/16.4  | 527/1.8  | 32.4                                                         |
| Er <sub>0.05</sub> FeMn/TiO <sub>2</sub>    | 271/20.1                                                                   | 382/22.4  | 524/0.4  | 42.9                                                         |
| FeMnTi-S                                    | 360/24.1                                                                   | 460/194.8 | 542/26.5 | 244.9                                                        |
| Er <sub>0.05</sub> FeMn/TiO <sub>2</sub> -S | 379/39.3                                                                   | 457/151.6 | 576/5.8  | 196.9                                                        |

Table S3. Calculation results of surface atomic concentration ratios of Fe, Mn and O in FeMn/TiO<sub>2</sub> and Er<sub>0.05</sub>FeMn/TiO<sub>2</sub> catalysts.

| Sample                                       | Mn<br>[%]   | Fe<br>[%]  | O<br>[%]    | S<br>[%] | N<br>[%] | Mn <sup>4+</sup> /Mn <sup>n+</sup><br>[%] | SO <sub>4</sub> <sup>2-</sup> /SO <sub>3</sub> <sup>2-</sup> | O <sub>α</sub> /O <sub>β</sub> + O <sub>α</sub><br>[%] |
|----------------------------------------------|-------------|------------|-------------|----------|----------|-------------------------------------------|--------------------------------------------------------------|--------------------------------------------------------|
| FeMn/TiO <sub>2</sub>                        | 16.2        | 4.7        | 79.1        | -        | -        | 31.9                                      | -                                                            | 20.9                                                   |
| <b>Er<sub>0.05</sub>FeMn/TiO<sub>2</sub></b> | <b>14.4</b> | <b>5.0</b> | <b>80.7</b> | <b>-</b> | <b>-</b> | <b>33.9</b>                               | <b>-</b>                                                     | <b>45.7</b>                                            |
| FeMn/TiO <sub>2</sub> -S                     | 12.8        | 3.6        | 76.2        | 5.3      | 2.2      | 26.8                                      | 1.1                                                          | 33.3                                                   |
| Er <sub>0.05</sub> FeMn/TiO <sub>2</sub> -S  | 13.9        | 3.9        | 77.8        | 2.8      | 1.6      | 29.7                                      | 0.5                                                          | 41.0                                                   |

## ● EDS result

The chemical analysis was obtained by energy dispersive X-ray spectrometer (EDS) SUPRA 55 (Zeiss, Germany), and the results were illustrated in Figure. S2 and Table. S4. The atomic percentages of Mn and Er elements over Er<sub>0.05</sub>FeMn/TiO<sub>2</sub> catalyst was 9.42 and 0.35, respectively. The calculated molar ratio of Er/Mn was 0.0375, which was a little lower than the set value of 0.05. It was mainly ascribed to the loss of Er element during the vacuum filtration process. The result implied that Er element had been doped in FeMn/TiO<sub>2</sub> catalyst successfully.

Table. S4. Surface element contents of FeMn/TiO<sub>2</sub> and Er<sub>0.05</sub>FeMn/TiO<sub>2</sub> catalysts

| Catalysts                                | Element        | O     | Ti    | Mn    | Fe   | Er   | Total |
|------------------------------------------|----------------|-------|-------|-------|------|------|-------|
| FeMn/TiO <sub>2</sub>                    | wt (%)         | 36.57 | 36.68 | 20.64 | 6.10 | 0    | 100   |
|                                          | Atomic percent | 64.63 | 21.65 | 10.62 | 3.09 | 0    | 100   |
| Er <sub>0.05</sub> FeMn/TiO <sub>2</sub> | wt (%)         | 37.68 | 35.78 | 18.41 | 6.03 | 2.10 | 100   |
|                                          | Atomic percent | 66.20 | 20.99 | 9.42  | 3.04 | 0.35 | 100   |

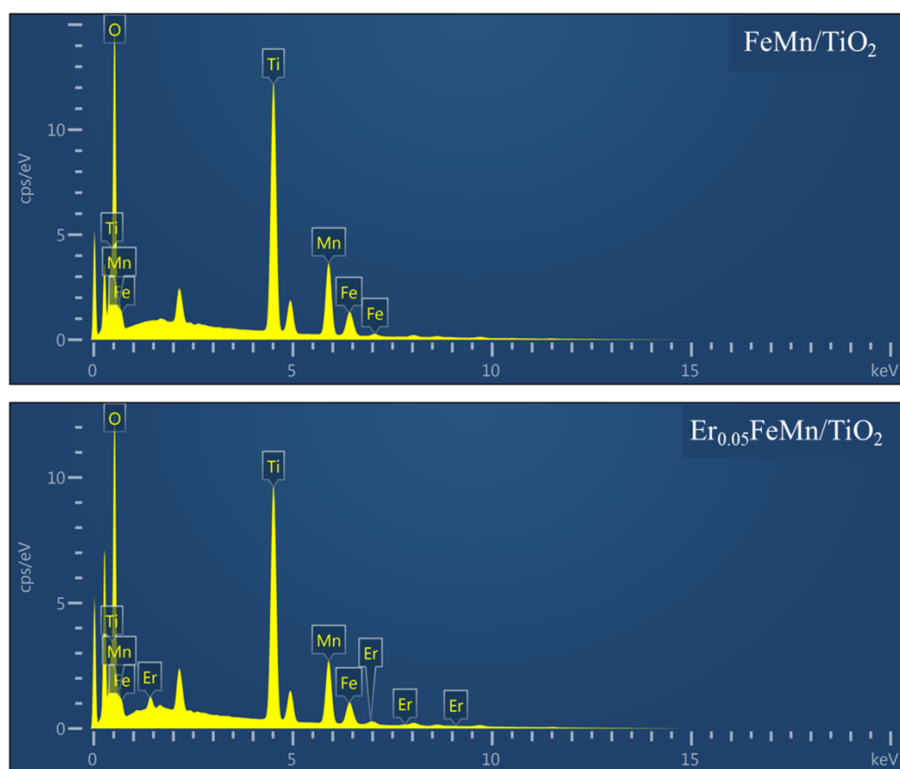

Figure S2. EDS mapping of  $\text{FeMn/TiO}_2$  and  $\text{Er}_{0.05}\text{FeMn/TiO}_2$  catalysts

### ● XPS survey spectrum

As the doping amount of Er was quite less, the high-resolution scan of Er by XPS was not performed in this work.

The XPS survey spectrum was illustrated in Figure S3. The weak peak centered at 168.8 eV which ascribed to Er 4*d* was found in the XPS survey spectrum of  $\text{Er}_{0.05}\text{FeMn/TiO}_2$  catalyst, suggesting that Er element had been doped in  $\text{FeMn/TiO}_2$  catalyst successfully.

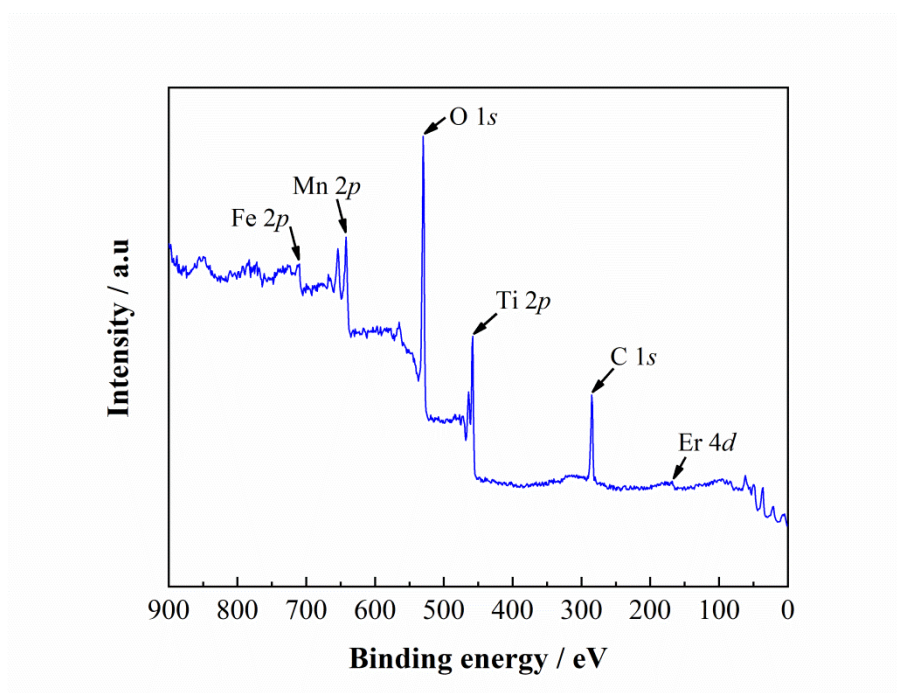

Figure S3. XPS survey spectrum of  $\text{Er}_{0.05}\text{FeMn}/\text{TiO}_2$  catalyst
